# Supplementary material for: SRPX2 and RAB31 are effective prognostic biomarkers in pancreatic cancer
Source: PubMed Central journal article supplement — J Cancer. 2019 Jun 2;10(12):2670–8. doi: 10.7150/jca.32072 (PMC6584922; doi:10.7150/jca.32072), 2019-06-02
Supplement: jcav10p2670s1.pdf [file jcav10p2670s1.pdf]

**Supplementary Figure 1: Expression of SRPX2 and RAB31 in different types of cancer cell lines.** Representative SRPX2 and RAB31 mRNA expression in tumor cells from CCLE analysis (shown in red frame). Expression of SRPX2 mRNA ranked fourth highest in a variety of cancer cell lines, and expression of RAB31 mRNA ranked thirteenth highest in a variety of cancer cell lines.

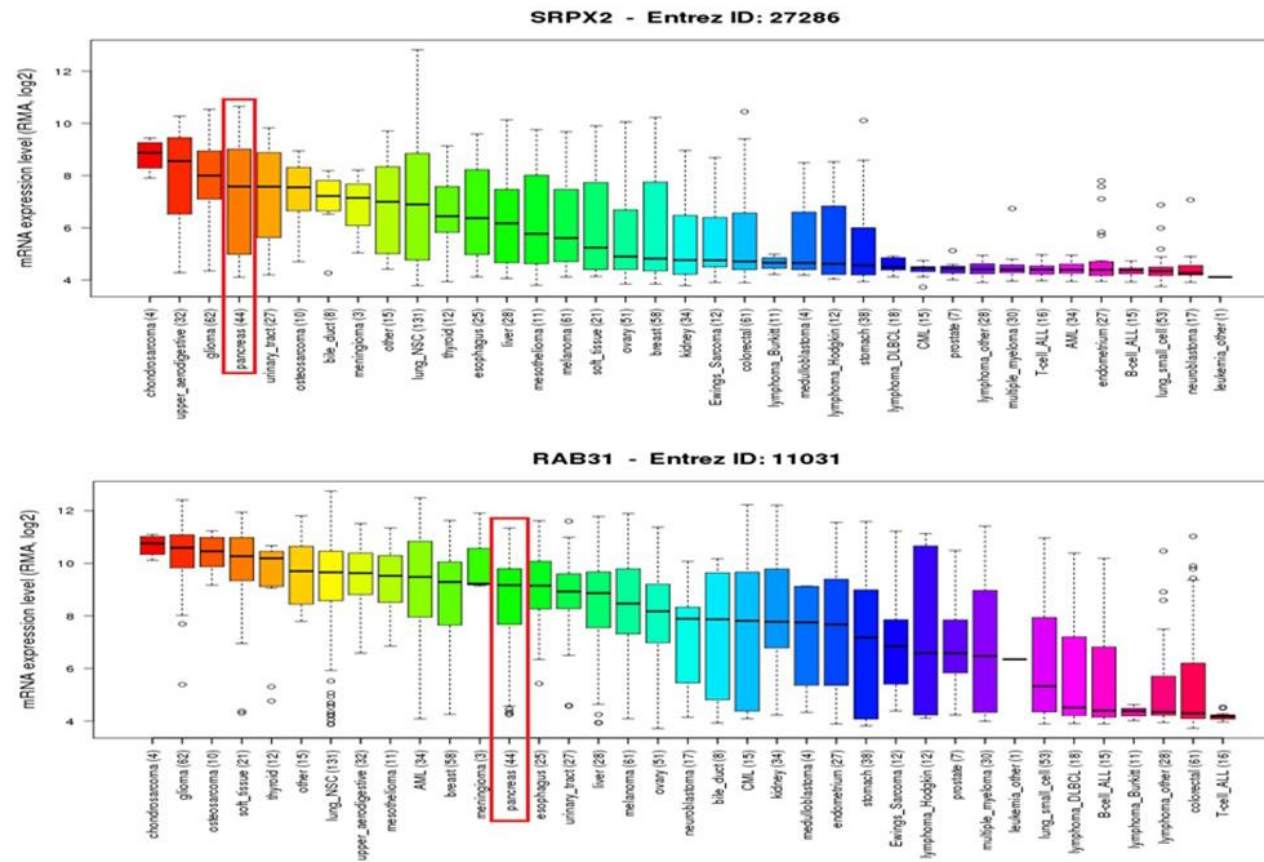

**Supplementary table 1.** Demographics and Clinicopathological Characteristics of the Sets of Patients with Resectable PDAC

| Features                                            | Training set<br>(n=79)       | Validation set<br>(n=121)    | <i>P</i><br>value |
|-----------------------------------------------------|------------------------------|------------------------------|-------------------|
| Age (years, median [range])                         | 61 (39-81)                   | 62 (38-78)                   | 0.802             |
| Sex (female/male)<br>(%)                            | 35/44<br>(44.3/55.7)         | 49/72<br>(40.5/59.5)         | 0.661             |
| Tumor location (head/body, tail)<br>(%)             | 41/38<br>(51.9/48.1)         | 65/56<br>(53.7/46.3)         | 0.801             |
| Neural invasion (yes/no)<br>(%)                     | 64/15<br>(81.0/19.0)         | 90/31<br>(74.4/25.6)         | 0.276             |
| Tumor size (cm, mean $\pm$ SD)                      | 5.12 $\pm$ 1.833             | 4.88 $\pm$ 1.824             | 0.517             |
| Preoperative CA19-9 (U/mL, median)<br>(range)       | 202<br>(1-1993)              | 201<br>(0-8733)              | 0.543             |
| 8 <sup>th</sup> edition TNM stage (I/II/III)<br>(%) | 21/41/17<br>(26.6/51.9/21.5) | 43/50/28<br>(35.5/41.3/23.1) | 0.297             |
| SRPX2 expression (High/Low)<br>(%)                  | 42/37<br>(53.2/46.8)         | 73/48<br>(60.3/39.7)         | 0.316             |
| RAB31 expression (High/Low)<br>(%)                  | 35/44<br>(44.3/55.7)         | 68/53<br>(56.2/43.8)         | 0.100             |

**Note:** TNM: tumor node metastasis; CA19-9: carbohydrate antigen 19-9.
